# Supplementary material for: Enzyme Replacement Therapy with Pabinafusp Alfa for Neuronopathic Mucopolysaccharidosis II: an Integrated Analysis of Preclinical and Clinical Data
Source: Preprints.org preprint supplement (doi:10.20944/preprints202109.0192.v1), 2021-09-10
Supplement: Supplementary file 1 [file supplementary]

Archive with 5 entries (5 files):
- Appendices A & B & C/Appendix A clinical trial details.docx
- Appendices A & B & C/Appendix B IRB approvals.docx
- Appendices A & B & C/JR-141-101 Inf Consent format.pdf
- Appendices A & B & C/JR-141-301 Inf Consent document.pdf
- Appendices A & B & C/JR-141-BR21 Inf Consent format.pdf
