# Supplementary material for: Enzyme Replacement Therapy with Pabinafusp Alfa for Neuronopathic Mucopolysaccharidosis II: an Integrated Analysis of Preclinical and Clinical Data
Source: Preprints.org preprint supplement (doi:10.20944/preprints202109.0192.v1), 2021-09-10
Supplement: Supplementary file 1 [file supplementary › Appendices A & B & C/Appendix B IRB approvals.docx]

1. IRB approvals for the Phase I/II study (JR-141-101 study) in 9 investigational sites in Japan

| Investigational site | IRB | Identification No. | Approval date |
| --- | --- | --- | --- |
| Kurume University Hospital | Local IRB established by the site | 216830 | 21/ Mar/2017 |
| Saitama Prefectural Children’s Medical Center | Local IRB established by the site | 29-1 | 26/April/2017 |
| Osaka City University Hospital | Local IRB established by the site | 101930 | 22/Feb/2017 |
| Gifu University Hospital | Local IRB established by the site | 29007 | 8/May/2017 |
| National Center for Child Health and Development | Local IRB established by the site | A29001 | 20/April/2017 |
| Jikei University Hospital | Local IRB established by the site | 28-31（3003） | 28/Feb /2017 |
| Osaka University Hospital | Local IRB established by the site | 179006 | 25/April/2017 |
| Tottori University Hospital | Local IRB established by the site | 29-002 | 22/Mar/ 2017 |

| Investigational site | IRB | Identification No. | Approval date |
| --- | --- | --- | --- |
| National Center for Child Health and Development | Central IRB (Pediatric Clinical Trials Network) | NW2018104 | 21/Aug/2018 |
| Osaka University Hospital | Local IRB established by the site | 180020-B | 24/July/2018 |
| Kurume University Hospital | Local IRB established by the site | 218810 | 17/July/2018 |
| Saitama Prefectural Children’s Medical Center | Local IRB established by the site | 30-4 | 10/Oct/2018 |
| Tottori University Hospital | Local IRB established by the site | 30-002 | 25/July/2018 |
| Gifu University Hospital | Local IRB established by the site | 30018 | 6/Aug/2018 |
| Osaka City University Hospital | Local IRB established by the site | 102014 | 25/July/2018 |
| Okayama Medical Center | Central IRB (Pediatric Clinical Trials Network) | NW2018104 | 21/Aug/2018 |
| Shizuoka Children’s Hospital | Central IRB (Pediatric Clinical Trials Network) | NW2018104 | 21/Aug/2018 |
| Kurashiki Central Hospital | Local IRB established by the site | 663 | 20/Aug/2018 |
| Ryukyu University Hospital | Local IRB established by the site | Heisei 30 No.14 | 18/Sep/2018 |
| Fujieda Municipal General Hospital | Local IRB established by the site | Not available* | 6/Sep/2018 |
| Osaka City General Hospital | Central IRB (Pediatric Clinical Trials Network) | NW2018104 | 21/Aug/2018 |
| Fukui University Hospital | Local IRB established by the site | 2018002 | 20/Aug/2018 |
| Jichi Medical School Hospital | Central IRB (Pediatric Clinical Trials Network) | NW2018104 | 21/Aug/2018 |
| Kanagawa Children’s Medical Center | Central IRB (Pediatric Clinical Trials Network) | NW2018104 | 21/Aug/2018 |
| Hokkaido Medical Center | Local IRB established by the site | 1809-A-03 | 5/Sep/2018 |
| Kumamoto University Hospital | Local IRB established by the site | 2018002 | 23/Oct/2018 |
| Fukuoka Children’s Hospital | Central IRB (Pediatric Clinical Trials Network) | NW2018104 | 16/ Oct/ 2018 |

1. IRB approvals for the Phase II/III study (JR-141-301 study) in 19 investigational sites in Japan

* Due to the limited number of clinical trials at the site, no ID number was conferred

1. IRB approvals for the Phase II study in two sites in Brazil

| Investigational site | IRB | Identification No. | Approval date |
| --- | --- | --- | --- |
| Hospital de Clínicas de Porto Alegre | Local IRB established by the site | 79886117.6.1001.5327 | 08/Dec/2017 |
| Instituto de Genética e Erros Inatos do Metabolismo | Local IRB established by the site | 79886117.6.2001.5505 | 07/June/2018 |
