# Supplementary material for: Enzyme Replacement Therapy with Pabinafusp Alfa for Neuronopathic Mucopolysaccharidosis II: an Integrated Analysis of Preclinical and Clinical Data
Source: Preprints.org preprint supplement (doi:10.20944/preprints202109.0192.v1), 2021-09-10
Supplement: Supplementary file 1 [file supplementary › Appendices A & B & C/JR-141-301 Inf Consent document.pdf]

# 患 者 さ ん へ

## JR-141 の <sup>ち け ん</sup>治験 について

(治験に参加するかどうかを決める前によくお読みください)

治験課題名：JR-141 のムコ多糖症Ⅱ型患者を対象とした第Ⅱ/Ⅲ 相試験

説明文書・同意書 [参考例]

治験実施計画書番号：JR-141-301

[ 病院 科]

[版番号 1.00.000：2018 年 5 月 15 日作成]

## 目次

|                                 |    |
|---------------------------------|----|
| 1. 治験とは.....                    | 4  |
| 2. ムコ多糖症Ⅱ型（ハンター症候群）とは.....      | 6  |
| 3. 治験に使う新しい薬（治験薬）について.....      | 7  |
| 4. 抗トランスフェリン受容体抗体について.....      | 8  |
| 5. この治験の目的と方法.....              | 9  |
| 6. 他の治療法について.....               | 17 |
| 7. 予測される利益および不利益について.....       | 18 |
| 8. 治験に関する情報の取扱いについて.....        | 22 |
| 9. 治験を中止する場合について.....           | 22 |
| 10. 健康被害に関する補償について.....         | 23 |
| 11. 治験中に守っていただくことについて.....      | 23 |
| 12. 治験の費用について.....              | 24 |
| 13. 治験で得られたデータの取扱いについて.....     | 25 |
| 14. 治験に関する問い合わせ先、医療機関の相談窓口..... | 26 |
| 15. 治験審査委員会.....                | 27 |

※ 本説明文書の最後に「同意書」があります。

## — 治 験 <sup>ち けん</sup> にご協力いただく患者さん（※代諾者の方）へ —

はじめに

現在、この病院では「ムコ多糖症Ⅱ型（ハンター症候群）」に対する「JR-141」という薬の治験を行っております。

これからあなたに、この薬の治験について説明させていただきます。説明内容を理解し、十分お考えの上で、この治験に参加するかしないかを決めてください。あなたがこの治験に参加するかしないかは全く自由です。あなたのお考えが尊重され、参加をことわっても不利益を受けることはありません。また一旦参加したあとも、途中でやめたいと思われたらいつでもやめることができます。そのときも一切、不利な扱いを受けることはありませんのでご安心ください。

なお、担当の医師の説明や、以下の文章を読んでわかりづらい点、もっと説明して欲しいことがありましたら、担当の医師あるいは相談窓口まで、遠慮なくお尋ねください。

本説明文書の内容を十分にご理解いただいた上で、同意書に署名するようにしてください。

※ 治験に参加される方が20歳未満の場合またはムコ多糖症Ⅱ型に伴う知的障害のためにご本人の意思確認が不可能な方は、代諾者（親権者、配偶者、後見人その他これらに準じる者）の同意が必要となります。

## 1. 治験とは

現在、いろいろな病気を治すために、病院ではたくさんの薬が使われており、多くの患者さんがその恩恵を受けています。これらの薬はすべて、国（厚生労働省）の許可（承認）を得てから使われています。

新しく開発された薬が許可されるためには、「臨床試験」が必要となります。臨床試験とは、健康な方や患者さんにご協力いただくことによって、薬の効果や安全性などを調べる、研究的な側面と試験的な側面を持った試験のことです。臨床試験のうち、国（厚生労働省）から薬として許可（承認）を得るために行う臨床試験のことを特に「治験」と呼んでいます。

一般的に、新しい薬が承認されるまでには、図1に示した3つの段階で治験が実施されます。

図1 新しい薬の承認までの流れ

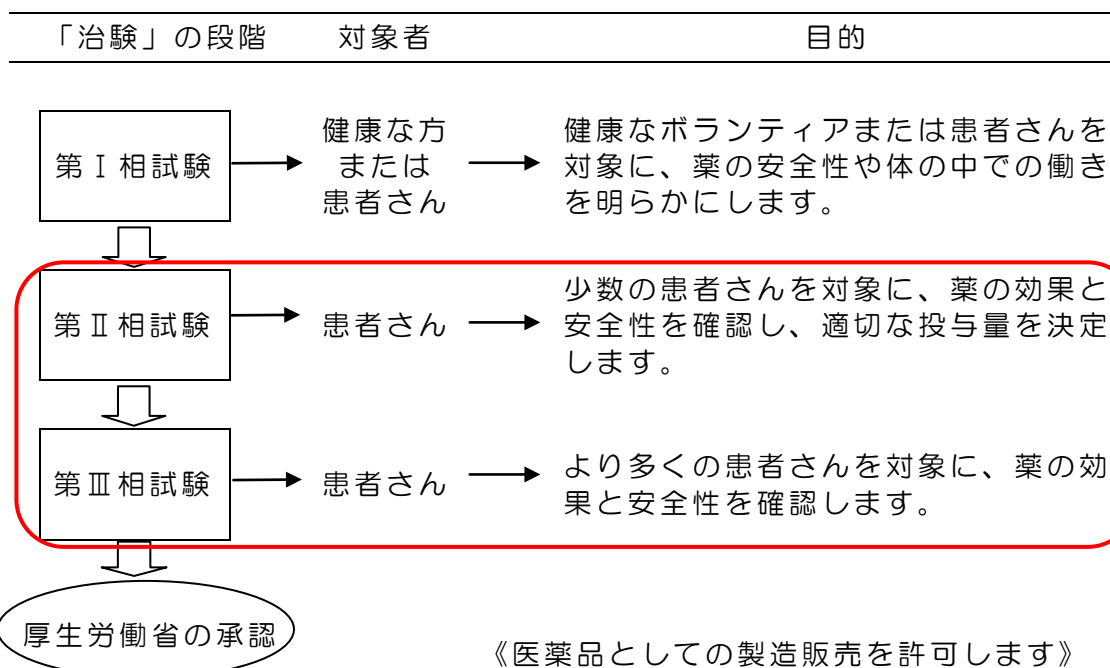

この治験は、男性のムコ多糖症Ⅱ型（ハンター症候群）の患者さんにJR-141 を投与し、JR-141 の効果や安全性を調べることを目的とした試験になります。図 1 の中では、赤枠で囲った第Ⅱ相試験および第Ⅲ相試験に該当します。

治験は、ご参加いただく方の権利が守られるよう、国が定めたルール（GCP<sup>\*1</sup>）に従って行われます。このルールの 1 つに、治験が適正に行われるか審査を行う制度があり、この審査を行う組織を「治験審査委員会」と呼んでいます。治験審査委員会は、医学・歯学・薬学、その他の医療または臨床試験に関する専門家のほか、専門家以外の人や医療機関と利害関係のない人で構成され、治験に参加される患者さんの人権や安全性などに問題ないかを科学的、倫理的観点などから審査します。

この治験の実施は、治験審査委員会で審査され、承認されており、今後もしも引き続き、この治験の継続について審査されます。なお、治験審査委員会を運営するための手順書、委員名簿および会議の内容等についてお知りになりたい場合は、資料を閲覧することができます。詳細は、「15. 治験審査委員会」に記載しております。

<sup>\*1</sup>：患者さんの人権の保護、安全の保持および福祉の向上のもとに治験の科学的な質と成績の信頼性を確保するための基準

## 2. ムコ多糖症Ⅱ型（ハンター症候群）とは

人の細胞内には、ライソゾームと呼ばれる細胞内小器官があり、体内で不要になった物質を様々な酵素を使って分解しています。ムコ多糖症Ⅱ型（ハンター症候群）とは、そのライソゾーム内に含まれる酵素の一つであるイズロン酸-2-スルファターゼの欠損または活性の低下により生じる病気です。そのため、本来分解されるべきグリコサミノグリカン（GAG）という物質が分解されにくくなり、全身の様々な細胞へ GAG が蓄積します（図 2）。この蓄積は、骨や関節、心臓、肝臓、脾臓の機能などに影響し、知的な発達にも影響する場合があります。適切な治療が行われない場合、脳障害、呼吸不全、心不全などの臓器障害に至ることがあります。

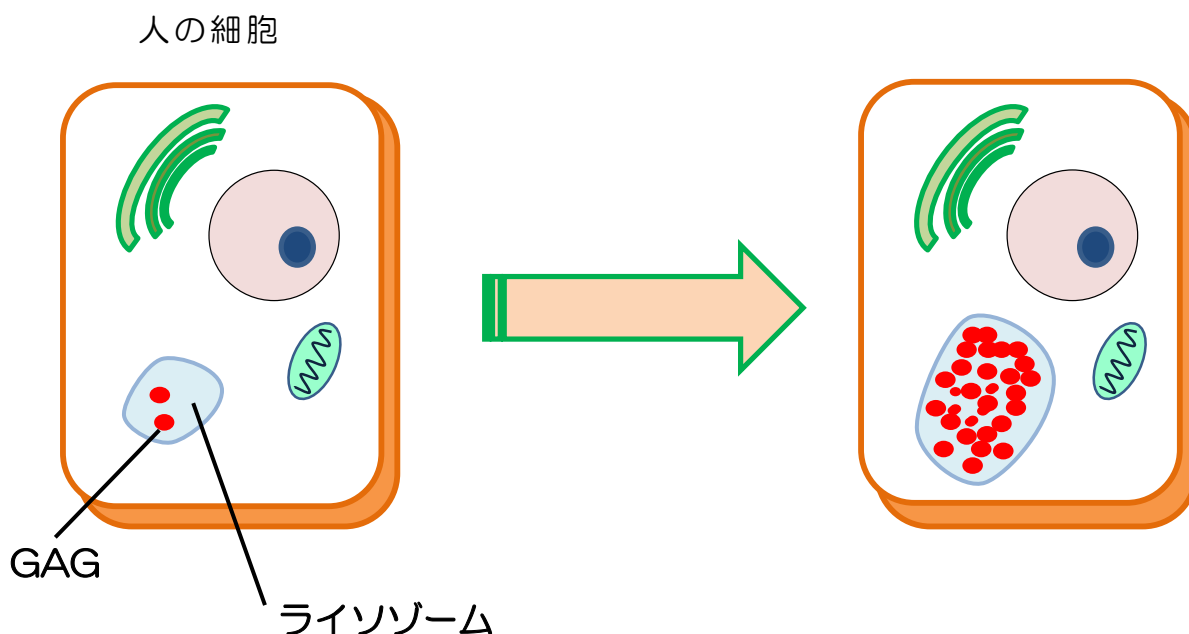

図 2 GAG の蓄積

### 3. 治験に使う新しい薬（治験薬）について

この治験に使う新しい薬（治験薬）の名前は「JR-141」といいます。JR-141 は遺伝子組換え技術により CHO 細胞（チャイニーズハムスターの卵巣細胞）を用いて作られた注射剤（点滴）です。JR-141 は、大きく分けて、酵素部分と付加物質の2つの部分からできています（図3）。

#### ●酵素部分

ムコ多糖症Ⅱ型（ハンター症候群）の患者さんで欠損または活性が低下している酵素（イズロン酸-2-スルファターゼ）です。すでに日本においてムコ多糖症Ⅱ型（ハンター症候群）の治療薬として承認されているエラプレースという薬とほぼ同じです。

#### ●付加物質

酵素部分が 血液 脳 関門<sup>\*2</sup> を通過し、脳の中まで到達するために付加する物質（抗トランスフェリン受容体抗体）です。

<sup>\*2</sup>：脳に有害な物質が入らないように、必要な物質のみを通すバリア機能のこと。通常、酵素のような大きな分子は通過できない仕組みになっています。

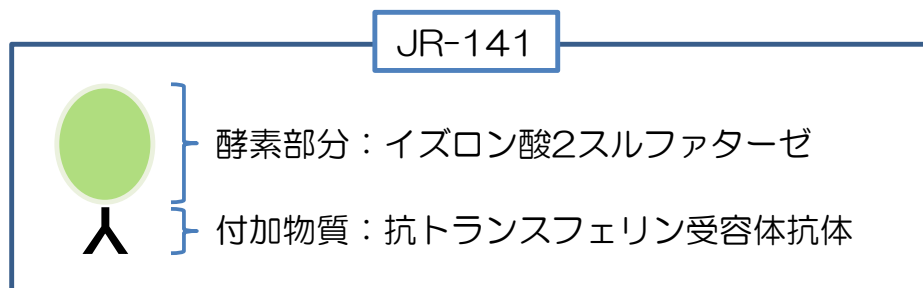

図3 JR-141 の構成

JR-141 は、マンノース 6 リン酸<sup>\*3</sup>（M6P）受容体またはトランスフェリン受容体を介して全身の細胞に取り込まれると考えられます。

付加物質である抗トランスフェリン受容体抗体については、次のページで詳しく説明します。

<sup>\*3</sup>：ライソゾーム内に含まれる酵素の多くがもつ分子のことであり、イズロン酸-2-スルファターゼも M6P をもっています。全身の細胞の表面には M6P 受容体が存在し、M6P をもつ酵素は、M6P 受容体を介して全身の細胞に取り込まれます。

## 4. 抗トランスフェリン受容体抗体について

脳の毛細血管の壁には、トランスフェリン<sup>\*4</sup>受容体があり、脳の働きに必要な鉄は、ここから脳の中へ取り込まれています（図4の①）。抗トランスフェリン受容体抗体とは、トランスフェリン受容体に結合する物質です。

<sup>\*4</sup>：主に肝臓で作られるタンパク質で、血液中では鉄と結合して鉄を体内の各組織に運搬する働きがあります。

通常、酵素のような大きい分子は、血液脳関門を通過することができません（図4の②）。そこで、JR-141は、上記で説明したトランスフェリン受容体と抗トランスフェリン受容体抗体が結合する仕組みを利用しています。JR-141の付加物質（抗トランスフェリン受容体抗体）が、トランスフェリン受容体に結合することにより、酵素部分（イズロン酸-2-スルファターゼ）を含むJR-141が血液脳関門を通過し、脳の中まで到達するように作られています（図4の③）。すでにサル、マウスを用いた試験では、JR-141が脳まで到達していることが確認されています。また、ムコ多糖症Ⅱ型の患者さんに、JR-141（体重1kgあたり最大で2.0mg）を4週間（週1回、合計4回）投与した治験では、安全性に問題がないこと、のうせきすいえき脳脊髄液内の蓄積物質が減少することが確認されています。

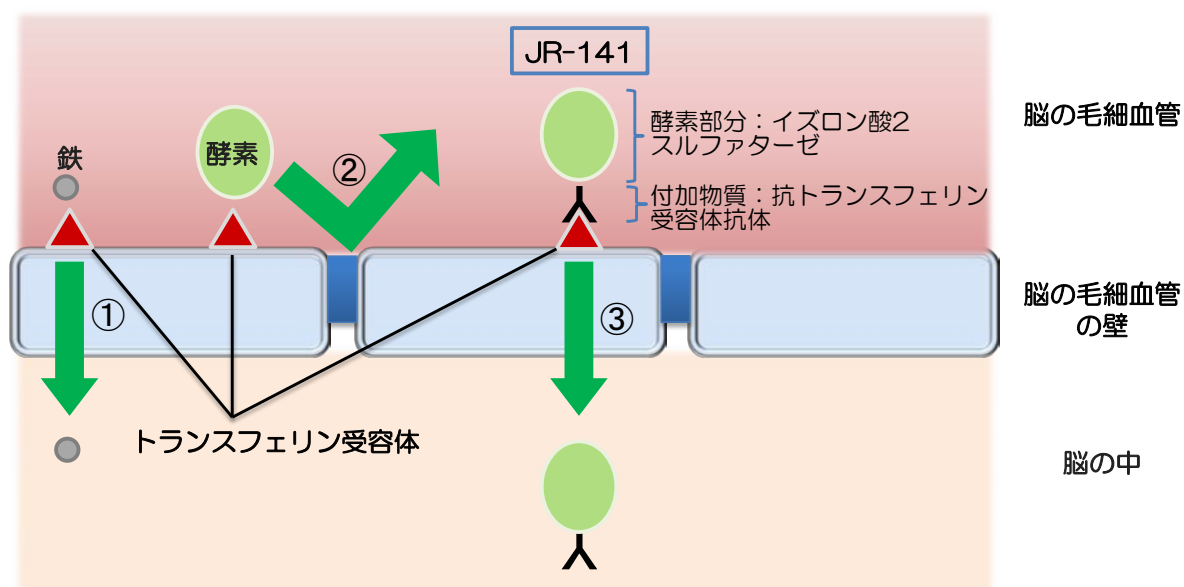

図4 JR-141が血液脳関門を通過する仕組み

## 5. この治験の目的と方法

### 〔目的〕

この治験の目的は、男性ムコ多糖症Ⅱ型（ハンター症候群）患者さんに、JR-141 を投与し、JR-141 の効果や安全性を調べることです。

### 〔方法〕

#### 1) JR-141 投与前にすること

この治験へ参加することに同意していただいた後、治験参加のための基準を満たしているかどうかを確認するために、スクリーニング検査を受けていただきます（図5）。なお、JR-141 投与前において、治験参加のための基準（表 1 および表 2）を満たしていない場合は、治験を継続することはできず中止となります。予めご了承ください。

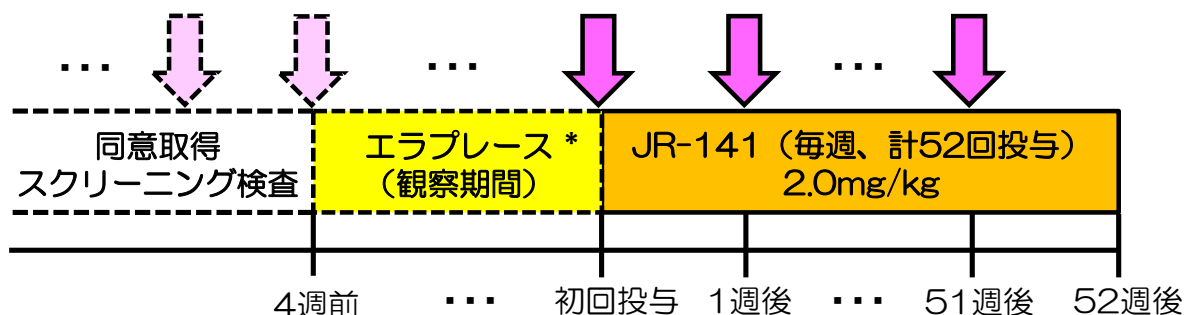

\*現在治療で用いられている注射剤（点滴）のことです。  
この治験が始まる前にエラブレース治療をされていない患者さんは、エラブレース投与がありません。

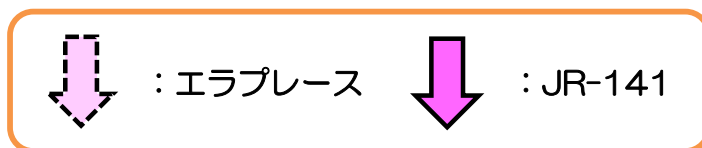

図 5 JR-141 の投与方法

#### 2) 治験期間

この治験は、同意していただいた時点から参加となります。その後、スクリーニング検査を経て、エラブレースを観察期間中継続的に投与していただき（治験開始前にエラブレース治療をされている患者さんのみ）、引き続き JR-141 を 52 週間（週 1 回、合計 52 回）投与し

ていただきます。

### 3) JR-141 の投与方法

JR-141 は52週間(週1回、合計52回)、体重1kgあたり2.0mgを短くておよそ3時間かけて点滴で投与します。ただし、エラプレースやJR-141を投与したときのあなたの様子によっては、3時間以上かけて注射することもあります。

### 4) 治験参加のための基準

JR-141 を適正に評価するため、また、あなたの安全性を確保するために、表1および表2の基準を設けています。男性ムコ多糖症Ⅱ型（ハンター症候群）患者さんのうち、表1をすべて満たし、表2に該当しない患者さんを対象とします。

表 1 すべてのあてはまる必要がある基準

- ☐ 本人の同意が文書で得られる（同意取得時に本人が 20 歳未満の場合またはムコ多糖症Ⅱ型に伴う知的障害のために本人の意思確認が不可能な場合はこの限りではない）
- ☐ 同意取得時に 20 歳未満またはムコ多糖症Ⅱ型に伴う知的障害のために本人の意思確認が不可能な場合は、代諾者による文書同意が得られる
- ☐ 酵素（イズロン酸-2-スルファターゼ）活性低下や遺伝子解析等により、総合的にムコ多糖症Ⅱ型と診断されている
- ☐ エラブレースによる治療を受けている場合は、観察期間を開始するまでの8週間以上エラブレースを継続的に投与されている

表 2 1 つでもあてはまると参加できない基準

- ☐ 過去に造血幹細胞移植を受けた（ただし、造血幹細胞移植後も酵素補充療法が必要な場合は除く）
- ☐ 関節拘縮<sup>\*5</sup>により<sup>かんせつこうしゆく</sup> 腰椎穿刺<sup>ようついせん し</sup>の体位を取ることが難しい、腰椎穿刺<sup>ようついせん し</sup>の際に呼吸困難になる可能性が高いなど、治験担当医師により、腰椎穿刺<sup>ようついせん し</sup>が実施不可能と登録時に判断された
- ☐ 治験担当医師により、治験参加を不適と判断される重篤な薬物アレルギーまたは過敏症を起こしたことがある
- ☐ 登録前 4 カ月以内に他の治験薬を投与された
- ☐ その他、治験担当医師により、対象として不適格と判断された

\*5：関節が固くなり、思うように身体が動かせない状態のことです。

## 5) 検査スケジュール

この治験では、表 3 のスケジュールで示した時期に、下記に示す検査・観察を行います。

### [検査・観察項目について]

#### ● 背景情報

下記情報を確認します。

- ・ 本治験の参加について文書同意をされた日
- ・ 患者さんの年齢
- ・ ムコ多糖症Ⅱ型と診断された日
- ・ エラブレースの投与を開始した日（投与されている場合）
- ・ ムコ多糖症Ⅱ型に伴う知的障害の有無
- ・ 発達評価の結果（実施されている場合）
- ・ ムコ多糖症Ⅱ型に関連する既往歴
- ・ 白血球、血漿または <sup>ばいようひふせんい</sup>培養皮膚線維 <sup>が</sup>芽細胞 <sup>が</sup>の酵素活性と測定日（測定されている場合）
- ・ 遺伝子解析の結果（治験参加前に検査を行っていない場合は、本治験実施中に測定していただきます）
- ・ エラブレース投与に関連した IAR<sup>\*6</sup>の有無
- ・ 尿中ウロン酸濃度の測定結果（実施されている場合）
- ・ 体重
- ・ 人種
- ・ 第Ⅰ/Ⅱ相試験への参加の有無

<sup>\*</sup>6：投与されたことに起因して発生する生体に有害な反応（悪寒、発熱、体温変動感、<sup>おしん</sup>悪心、高血圧など）。

## ● 血液検査・尿検査

血液検査・尿検査の項目は、下記のとおりです。

|      |                                                                                                                                               |
|------|-----------------------------------------------------------------------------------------------------------------------------------------------|
| 血液検査 | 血液学的検査〔白血球数、白血球分画（好中球、好酸球、好塩基球、リンパ球、単球）、赤血球数、血色素量、ヘマトクリット値、血小板数、MCV、MCH、MCHC、網状赤血球比、PT、APTT〕                                                  |
|      | 血液生化学的検査〔総蛋白、アルブミン、アルブミン/グロブリン比、ハプトグロビン、CK、総ビリルビン、AST(GOT)、ALT(GPT)、 $\gamma$ -GT( $\gamma$ -GTP)、ALP、総コレステロール、中性脂肪、尿素窒素、クレアチニン、Na、K、Cl、Ca、P〕 |
|      | 鉄関連検査〔血清鉄、UIBC、TIBC、フェリチン、TSAT〕                                                                                                               |
|      | 血清中 HS 濃度 <sup>a)</sup> 、血清中 DS 濃度 <sup>a)</sup>                                                                                              |
| 尿検査  | 抗体検査〔抗 IDS（抗エラプレース）抗体、抗 JR-141 抗体〕                                                                                                            |
|      | 尿定性〔糖、蛋白、潜血〕                                                                                                                                  |
|      | 尿中 HS 濃度 <sup>a)</sup> 、尿中 DS 濃度 <sup>a)</sup> 、尿中ウロン酸濃度、尿中クレアチニン <sup>b)</sup>                                                               |

<sup>a)</sup>HS はヘパラン硫酸、DS はデルマタン硫酸のことであり、GAG の一種です。

<sup>b)</sup>尿中 HS 濃度、尿中 DS 濃度、尿中ウロン酸濃度の測定値の補正のために測定します。

## ● 脳脊髄液検査

通常は、背中に針をさし（腰椎穿刺<sup>ようついせんし</sup>）、髄液を採取します。脳脊髄液中の JR-141 の濃度、HS 濃度、DS 濃度を測定します。

## ● バイタルサイン

脈拍数、体温、血圧を測定します。

## ● CT 検査

肝臓および脾臓の大きさを調べるため、CT 検査を行います。

- **心エコー検査、12誘導心電図**

心臓の働きを調べるため、心エコー検査および12誘導心電図を行います。

- **歩行試験**

心肺の機能、筋肉の持久力を調べるため、治験担当医師に適切に実施することが可能と判断された患者さんは、6分間歩行試験を行います。

- **関節可動域**

関節の動く範囲を調べるため、肩、肘、股、膝の関節可動域を角度計を用いて測定します。

- **発達評価**

心身の発達の度合いを調べるために2つの発達評価（Vineland-II 適応行動尺度、新版 K 式発達検査2001）を行います。

- **有害事象の確認**

有害事象とは、治験期間中（初回投与時以降、52週後検査時まで）に起こったあらゆる好ましくない症状のことです。投与された治験薬が原因であるかどうかは問いません。あなたの安全性を確かめるため、有害事象の確認を行います。

- **併用薬・併用療法の確認**

治験期間中に、使用できない薬を使用していないか、実施できない治療を受けていないか、有害事象が起こっていないかなどを確認するために、あなたが治験期間中に使用している薬、実施している治療について、確認を行います。

表3 検査・観察の実施時期および項目の一覧表

|                       |                              | 同意取得時 | スクリーニング検査 | 4週前 <sup>e)</sup>  | 2週前 | 1週前 | 初回投与時検査 | 初回投与時 | 1週後 | 2週後 | 4週後 | 8週後 | 12週後 | 24週後 | 25週後 | 26週後 | 38週後 | 50週後 | 51週後 | 52週後 | 中止時             |
|-----------------------|------------------------------|-------|-----------|--------------------|-----|-----|---------|-------|-----|-----|-----|-----|------|------|------|------|------|------|------|------|-----------------|
| 同意取得                  |                              | ○     |           |                    |     |     |         |       |     |     |     |     |      |      |      |      |      |      |      |      |                 |
| 背景情報                  |                              |       | ○         |                    |     |     |         |       |     |     |     |     |      |      |      |      |      |      |      |      |                 |
| 血液検査                  | 血液学的検査                       |       | ○         |                    |     |     |         | ○     | ○   | ○   | ○   | ○   | ○    |      | ○    |      | ○    |      |      | ○    | ○               |
|                       | 血液生化学的検査                     |       | ○         |                    |     |     |         | ○     | ○   | ○   | ○   | ○   | ○    |      | ○    |      | ○    |      |      | ○    | ○               |
|                       | 鉄関連検査                        |       | ○         |                    |     |     |         | ○     | ○   | ○   | ○   | ○   | ○    |      | ○    |      | ○    |      |      | ○    | ○               |
|                       | 血清中 HS/DS 濃度                 |       |           | ○                  | ○   | ○   |         | ○     |     |     | ○   | ○   | ○    | ○    | ○    | ○    | ○    | ○    | ○    | ○    | ○               |
|                       | 抗体検査                         |       |           |                    |     |     |         | ○     |     |     | ○   |     | ○    |      | ○    |      | ○    |      |      | ○    | ○               |
| 尿検査                   | 尿定性                          |       | ○         |                    |     |     |         | ○     | ○   | ○   | ○   | ○   | ○    |      | ○    |      | ○    |      |      | ○    | ○               |
|                       | 尿中 HS/DS/ウロン酸濃度、<br>尿中クレアチニン |       |           | ○                  |     |     |         | ○     |     |     | ○   | ○   | ○    |      | ○    |      | ○    |      |      | ○    | ○               |
| 脳脊髄液検査                |                              |       |           | ○ <sup>a),b)</sup> |     |     | ○       |       |     |     |     |     |      |      | ○    |      |      |      |      | ○    | ○ <sup>c)</sup> |
| バイタルサイン <sup>d)</sup> |                              |       |           |                    |     |     |         | ○     | ○   | ○   | ○   | ○   | ○    |      | ○    |      | ○    |      |      | ○    | ○               |
| CT 検査                 |                              |       |           |                    |     |     | ○       |       |     |     |     |     |      |      | ○    |      |      |      |      | ○    | ○               |
| 心エコー検査                |                              |       |           |                    |     |     | ○       |       |     |     |     |     |      |      | ○    |      |      |      |      | ○    | ○               |
| 12 誘導心電図              |                              |       | ○         |                    |     |     | ○       |       |     |     |     |     |      |      | ○    |      |      |      |      | ○    | ○               |
| 発達評価 <sup>c)</sup>    |                              |       |           |                    |     |     | ○       |       |     |     |     |     |      |      | ○    |      |      |      |      | ○    | ○               |
| 歩行試験 <sup>c)</sup>    |                              |       |           |                    |     |     | ○       |       |     |     |     |     |      |      | ○    |      |      |      |      | ○    | ○               |
| 関節可動域                 |                              |       |           |                    |     |     | ○       |       |     |     |     |     |      |      | ○    |      |      |      |      | ○    | ○               |
| 有害事象、併用薬・併用療法の確認      |                              |       |           |                    |     |     |         |       |     |     |     |     |      |      |      |      |      |      |      |      | ○               |

a) HS 濃度、DS 濃度のみ測定します。

b) 第 I/II 相試験に参加した患者さんは検査をおこないません。

c) 治験担当医師が実施可能と判断した場合のみ行います。

d) 検査は基本的にエラブレースまたは JR-141 投与の前に行いますが、バイタルサインは下記のタイミングで行います。

バイタルサイン：初回投与時から 38 週後は JR-141 投与の前、52 週後はエラブレースまたは JR-141 投与前

e) エラブレースによる治療を受けていない患者さんは実施しません。

## 6) 血液検査における採血量について

採血量は、表 4 に示す通りです。採血ポイントは、表 3 に示しています。なお、好ましくない事象が生じるなど、担当医師が必要と判断した時には、追加検査を実施する場合があります。その場合は、採血量・採血回数が増えることがありますので、ご了承ください。

表 4 採血量一覧

|              | 採血量           | 採血回数 <sup>a)</sup>            | 総採血量                             |
|--------------|---------------|-------------------------------|----------------------------------|
| 血液学的検査       | 3.8 mL        | 10 回                          | 38 mL                            |
| 血液生化学的検査     | 合わせて<br>10 mL | 10 回                          | 合わせて<br>100 mL                   |
| 鉄関連検査        |               |                               |                                  |
| 血清中 HS/DS 濃度 | 0.3mL         | 13 回または<br>14 回 <sup>b)</sup> | 3.9mL または<br>4.2mL <sup>b)</sup> |
| 抗体検査         | 2mL           | 6 回                           | 12mL                             |

<sup>a)</sup>注射針を刺す回数は、検査実施日あたり 1 回です。ただし、場合によって複数回注射針を刺す場合があります。

<sup>b)</sup>エラブレースによる治療を受けていない患者さんは採血回数 13 回、総採血量 3.9mL になります。

## 7) 脳脊髄液検査における脳脊髄液の採取量について

採取量は、表 5 に示す通りです。採取ポイントは、表 3 に示しています。なお、好ましくない事象が生じるなど、担当医師が必要と判断した時には、追加検査を実施する場合があります。その場合は、採取量・採取回数が増えることがありますので、ご了承ください。

**表 5 脳脊髄液の採取量一覧**

| 採取量                           | 採取回数                    | 総採取量                          |
|-------------------------------|-------------------------|-------------------------------|
| 0.2mL または 0.4mL <sup>a)</sup> | 3 または 4 回 <sup>b)</sup> | 1.2mL または 1.4mL <sup>b)</sup> |

<sup>a)</sup> 4 週前の採取量のみ 0.2mL です。

<sup>b)</sup> 第 I/II 相試験に参加していた患者さん、エラブレースによる治療を受けていない患者さんは採取回数 3 回、総採取量 1.2mL になります。

## 8) 治験への参加予定期間

この治験は、2018 年 8 月から 2020 年 5 月まで実施される予定です。治験参加期間は、上記の期間の中で、同意された時点から 52 週後検査までとなります。

## 9) この治験に参加する予定の患者さんの人数

この治験では、全国で 20 名の患者さんの参加を予定しております。

## 6. 他の治療法について

現在、日本においてムコ多糖症Ⅱ型（ハンター症候群）の治療薬として承認を受けている薬に、遺伝子組換えイズロン酸-2-スルファターゼ製剤であるエラブレースがあります。なお、エラブレースは血液脳関門を通過することができないため、脳の症状に対する効果は認められていません。

また、造血幹細胞移植を受ける患者さんもいらっしゃいます。

さらに、現在、脳に管を通し、直接脳の中に薬を注入する治験も進められています。

## 7. 予測される利益および不利益について

### 7.1 予測される利益

ムコ多糖症Ⅱ型患者さんに JR-141（体重 1 kg あたり最大で 2.0 mg）を 4 週間（週 1 回、合計 4 回）投与した第 I/II 相試験において、脳脊髄液中 HS 濃度、DS 濃度の減少と、エラプレースと同程度の血清中 HS 濃度、DS 濃度および尿中 HS 濃度、DS 濃度、GAG 濃度の減少が確認されています。

そのため、JR-141 は、ムコ多糖症Ⅱ型の脳に関連する症状に対する効果が期待できると考えられます。また、全身症状に対しても、エラプレースと同等の効果が期待できると考えられます。

### 7.2 予測される不利益

#### 1) JR-141 の使用による副作用<sup>\*7</sup> 発生の可能性

JR-141 の使用による副作用発生の可能性が考えられます。JR-141 は抗トランスフェリン受容体抗体を含むため、通常鉄の運搬（トランスフェリンとトランスフェリン受容体の結合）が阻害されることによる副作用（貧血など）が発生する可能性が考えられます。また、血液脳関門を通過することが想定されるため、それに関連する副作用（嘔吐、頭痛など）が発生する可能性があります。また、JR-141 の酵素部分は、エラプレースとほぼ同じです。そのため、エラプレースと同様の副作用が発生する可能性が考えられます。

<sup>\*7</sup>：治験薬投与中に起こる、あらゆる好ましくない症状のうち、投与された治験薬が原因であることを否定できないもの。

以下に、JR-141 の特性より生じるおそれのある副作用と、それに対する対応について説明します。

### (1) これまでに報告されている JR-141 の副作用

ムコ多糖症Ⅱ型患者さんに JR-141（体重 1 kg あたり最大で 2.0 mg）を 4 週間（週 1 回、合計 4 回）投与した第Ⅰ/Ⅱ相試験において、14 名中 7 名（50.0%）で副作用が認められました。また、その内訳は、「発熱」が 3 名（21.4%）、「蕁麻疹」が 2 名（14.2%）「紅斑」「譫妄」「咽喉刺激感」「ハプトグロビン減少」が各 1 名（7.1%）でした。「紅斑」「発熱」「咽喉刺激感」については、IAR でしたが、いずれも回復したことを確認しています。「譫妄<sup>\*8</sup>」については、患者さんが入院を要する状態となりましたが、13 日間で症状が回復したことを確認しています。

<sup>\*8</sup>：意識が一時的または持続的に障害を受けることに加えて、錯覚や幻覚が見られるような状態。

### (2) アナフィラキシーショック<sup>\*9</sup>の可能性とその対応について

JR-141 はタンパク質製剤であるため、アナフィラキシーショックが起こる可能性を否定できません。

投与中は観察を十分に行い、異常が認められた場合には投与を中止し、適切な処置を行います。再投与は行いません。原因を調べるための検査を行います。また、このような症状の発現に備え、緊急処置を取れるよう準備をしております。

<sup>\*9</sup>：じんま疹などの皮膚症状や、腹痛や嘔吐などの消化器症状、息苦しさなどの呼吸器症状、突然の蒼白、意識の混濁などのショック症状のことをアナフィラキシーといいます。特に血圧低下が急激に起こり、意識障害などを呈する状態をアナフィラキシーショックといいます。

### (3) 投与関連反応（IAR）の可能性とその対応について

JR-141 の投与により、IAR が発現する可能性があります。IAR が現れた場合には、投与速度を下げるか、もしくは一旦投与を中止し、適切な薬剤（副腎皮質ホルモン剤、抗ヒスタミン剤、解熱鎮痛剤または抗炎症剤）の投与や酸素投与などの処置を行います。また、一度 IAR が発現した場合、次回以降は、投与開始前に前投薬（副腎皮質ホルモン剤、抗ヒスタミン剤、解熱鎮痛剤または抗炎症剤）を行ったり、投与速度を調節するなど、十分注意の上で投与します。

#### （４）抗 JR-141 抗体産生の可能性とその対応について

人の体は、免疫システムの 1 つとして、入ってきた異物を退治する「抗体」というタンパク質を作り出すことができます。抗体は、免疫において重要な役割を担いますが、薬に対してもそれを異物として認識し、薬の効果を弱めてしまうことがあります。

JR-141 も、ムコ多糖症Ⅱ型（ハンター症候群）の患者さんに投与されることで、JR-141 に対する抗体が作られる可能性があります。この抗体は、JR-141 の効果を弱める可能性があります。また、JR-141 に対する抗体は、JR-141 とエラプレースの両方に作用する可能性があります。

#### （５）動物を用いた安全性試験の結果について

サルに JR-141 を 26 週間（週 1 回、合計 27 回）投与した試験の結果、JR-141 が原因と考えられる異常は確認されませんでした。

また、幼若なサルに JR-141 を 4 週間（週 1 回、合計 5 回）投与した試験の結果からも、JR-141 が原因と考えられる異常は確認されませんでした。

## 2) 治験の検査による痛みや副作用発生の可能性

この治験で行う血液採取、脳脊髄液の採取（<sup>ようついでんし</sup>腰椎穿刺）とそれに伴う痛みや出血の可能性が考えられます。腰椎穿刺後に、頭痛や吐き気等の症状が現れる可能性もあります。

治験期間中は、診察や様々な検査を通し、患者さんの身体の状態を十分に調べます。また、治験に参加された患者さんの安全には十分に配慮しつつ、この治験を進めてまいります。もし、身体の具合が悪くなったり、不都合が感じられたりした場合は、すぐに担当の医師までご連絡ください。

## 8. 治験に関する情報の取扱いについて

この治験に参加していただいている間に、この治験を続ける意思に影響を与える可能性のある情報が得られた場合には、すみやかに担当の医師から、その内容を説明させていただきます。そして、この治験への参加を続けるかどうか、もう一度あなたに確認させていただきます。もし、この時点で治験への参加をやめた場合でも、あなたが不利益を受けることはありません。

## 9. 治験を中止する場合について

あなたの安全を確保するため、以下の項目にあてはまる場合には、治験を中止させていただきます。

- ・ あなたまたは代諾者が治験の中止を申し出た場合。
- ・ あなたが治験の途中で転院・転居等のため、治験継続が不可能となった場合。
- ・ 治験開始後に、あなたが治験参加のための基準を満たしていないことが判明した場合。
- ・ アナフィラキシーショックが起こった場合。
- ・ 臨床検査値（血液検査や尿検査など）の異常、その他副作用、医療上好ましくない出来事のために、担当の医師が治験を中止する必要があると判断した場合。
- ・ その他、担当の医師が、あなたの健康上、これ以上治験を続けることは好ましくないと判断した場合。

また、この薬の開発を進められないような重大な問題が発生した場合にも、治験全体を中止させていただきます。

治験への参加を中止した後も、担当の医師が責任をもって、あなたの治療を行います。

## 10. 健康被害に関する補償について

この治験に参加し、JR-141 を投与したことによって、あなたが何らかの健康被害を受けた場合には、治療にかかった費用などの補償を求めることができます。その場合には、担当の医師に相談してください。あなたの身体に、何か異常を感じた場合には、いつでもどんなことでもかまいませんので遠慮なく、直ちに担当の医師か治験コーディネーターに申し出てください。また、その他、治験相談窓口も設けております（14. 治験に関する問い合わせ先、医療機関の相談窓口）。もしも、副作用がみられた時には、直ちに最善を尽くして治療にあたります。また、必要に応じて専門医師による診断・治療も行います。ただし、虚偽の申告や担当の医師の指示に従わなかったことが原因の場合は、補償がされない、もしくは制限されることがあります。なお、「薬が効かなかった」という申し出については、補償することができませんので、ご了承ください。

詳しくは、別にお渡しいたします「健康被害補償の概要」をお読みください。

## 11. 治験中に守っていただくことについて

- 1) 病気の状態を正しく評価するため、担当医師から説明されたことを守り、スケジュールに従って来院するようにしてください。
- 2) あなたの安全を確保するため、体調に何か異常を感じた際には、すぐに担当医師などに連絡し指示に従ってください。
- 3) 治験期間中は、使用できない薬がありますので、他院受診時や本院の他科受診時などに、新たに薬を使用する場合は、使用する前に担当医師などにご連絡ください。また現在、あなたが使用している薬がありましたら、すべて担当の医師にお知らせください。
- 4) 他の診療科に通院されている場合、また新たに受診される場合は、こちらからお渡しする「治験参加カード」を提示し、治験に参加し

ていることをお伝えください。

- 5) 本治験で使用する資料、発生した有害事象、実施された検査内容および治験薬に対する個人的な感想等、本治験に係わるあらゆる情報について、Web サイトまたは SNS (Facebook、Twitter 等) およびその他の各種情報媒体 (新聞、雑誌、広告等) に提示しないでください。

## 12. 治験の費用について

JR-141 が投与されている期間は、すべての検査にかかる費用は、治験を依頼している製薬会社が負担します。JR-141 も無料で提供されます。このため、JR-141 が投与されている期間は、あなたが普段支払っている健康保険などの一部負担が少なくなります。また、その後の経過を見るための検査費用のうち、治験のために特別に行うものについては製薬会社が負担し、治験に参加しなくても必要な検査は通常の保険診療で行われます。治験に参加することで、金銭的負担が増えることはありません。

なお、この治験に参加していただくことで通常の診療よりも来院回数が増えることや担当の医師や相談窓口への通信費用など、負担が増える場合も考えられます。治験参加に伴う負担を少しでも軽減するための費用 (負担軽減費) として、治験のための来院日 (治験薬投与日や検査実施日) に対して 1 日あたり●●●円をお支払いいたします。お支払方法は、一定期間ごとにまとめて、あなたの指定する金融機関の口座に振り込む予定です。また、治験のみのために入院をしていただく場合には、一回の入院あたり●●●円をお支払いいたします。

### 13. 治験で得られたデータの取扱いについて

あなたの人権が守られながら、この治験がきちんに行われているかどうかを調べるために、この治験を依頼した製薬会社が指定した者（モニターおよび監査担当者等）、あなたが受診されている病院の担当者（この病院の治験審査委員会）、この薬を審査する厚生労働省などの担当者が、あなたの医療記録（カルテ等）を見ること（閲覧）があります。その際、あなたの個人情報の秘密は保たれますが、あなたが同意書に署名するとカルテなどの閲覧を含めて同意したことになります。

ムコ多糖症Ⅱ型の遺伝子情報を含むこの治験により得られたあなたのデータは、厚生労働省に対する申請資料として提出されたり、規制当局での研究に利用されることがあります。また、論文あるいは学会発表として外部に発表されることもあるため、あなたが受診されている病院と治験依頼者である製薬会社に保管されます。しかし、その際、個人情報が公表されることはなく、個人を特定し得る情報はすべて秘密とされますので、ご安心ください。

## 14. 治験に関する問い合わせ先、医療機関の相談窓口

この治験に参加されることは、あなたの自由な意思に基づくものですから、誰からも強要されるものではありません。説明の中でこの治験に関する分からない言葉や質問、疑問がある場合や、もう一度聞きたいことなどがありましたら、下記の連絡先にお気軽にご質問・ご相談ください。

なお、この治験により何らかの問題が生じた場合には、至急、担当の医師あるいは相談窓口までご連絡をお願いします。

XXXXXXXXXXXXX 病院

XX 科・外来：###-###-####

治験責任医師：\_\_\_\_\_科（職名）\_\_\_\_\_（名前）\_\_\_\_\_

◎休日・夜間緊急連絡先

XX : ###-###-####

◎治験に関する相談窓口（#～#曜日、##:##～##:##）

治験管理センター：###-###-####

## 15. 治験審査委員会

この治験は、この病院が設置している治験審査委員会で、倫理的、科学的、医学的妥当性の観点から十分審査され、承認を得ています。治験審査委員会の審議内容等については、Web(<http://.....>)をご覧ください。か、###にお申し出いただければ閲覧できます。

| 治験審査委員会<br>の<br>名前 | 所在地と<br>設置者 | 種類と審査する内容 | その他                                                   |
|--------------------|-------------|-----------|-------------------------------------------------------|
|                    |             |           | さらにくわしい情報は、##<br>#にお申し出<br>いただければ<br>確認すること<br>ができます。 |

## 書 意 同

わたしは、「JR-141 のムコ多糖症Ⅱ型患者を対象とした第Ⅱ/Ⅲ相試験」についての十分な説明を受け、以上の文章を読み、理解したうえで、この治験に自発的に参加することに同意いたしました。

なお、わたしは、この同意書の写しと同意のために用いられた説明文書を受け取りました。

同意者（患者さん）

(同意日) 20      年      月      日 氏名

(自筆でご記入ください。)

※ 治験に参加される方が 20 歳未満の場合または知的障害等によりご本人の意思確認が不可能な場合

代諾者（同意者との続柄： ）、治験参加者氏名：

(同意日) 20      年      月      日      氏名

(自筆でご記入ください。)

緊急連絡先（電話番号）：

説明者（治験担当医師）

(同意確認日) 20 年 月 日

氏名

(記名捺印または署名)

補足説明者（治験協力者）

(説明日) 20 年 月 日

氏名

(記名捺印または署名)

# 同意書

わたしは、「JR-141 のムコ多糖症Ⅱ型患者を対象とした第Ⅱ/Ⅲ相試験」についての十分な説明を受け、以上の文章を読み、理解したうえで、この治験に自発的に参加することに同意いたしました。

なお、わたしは、この同意書の写しと同意のために用いられた説明文書を受け取りました。

同意者（患者さん）

（同意日）20 年 月 日 氏名

（自筆でご記入ください。）

※ 治験に参加される方が 20 歳未満の場合または知的障害等によりご本人の意思確認が不可能な場合

代諾者（同意者との続柄：\_\_\_\_\_）、治験参加者氏名：\_\_\_\_\_

（同意日）20 年 月 日 氏名

（自筆でご記入ください。）

緊急連絡先（電話番号）：\_\_\_\_\_

説明者（治験担当医師）

（同意確認日）20 年 月 日

氏名

（記名捺印または署名）

補足説明者（治験協力者）

（説明日）20 年 月 日

氏名

（記名捺印または署名）

# 同 意 書

わたしは、「JR-141 のムコ多糖症Ⅱ型患者を対象とした第Ⅱ/Ⅲ相試験」についての十分な説明を受け、以上の文章を読み、理解したうえで、この治験に自発的に参加することに同意いたしました。

なお、わたしは、この同意書の写しと同意のために用いられた説明文書を受け取りました。

同意者（患者さん）

（同意日）20 年 月 日 氏名

（自筆でご記入ください。）

※ 治験に参加される方が 20 歳未満の場合または知的障害等によりご本人の意思確認が不可能な場合

代諾者（同意者との続柄： ）、治験参加者氏名：

（同意日）20 年 月 日 氏名

（自筆でご記入ください。）

緊急連絡先（電話番号）：

説明者（治験担当医師）

（同意確認日）20 年 月 日

氏名

（記名捺印または署名）

補足説明者（治験協力者）

（説明日）20 年 月 日

氏名

（記名捺印または署名）
